# Supplementary material
Source: PubMed Central journal article supplement (PMC2840092)
Supplement: 0910684107_pnas.200910684SI.pdf [file 0910684107_pnas.200910684SI.pdf]

# Supporting Information

Carén et al. 10.1073/pnas.0910684107

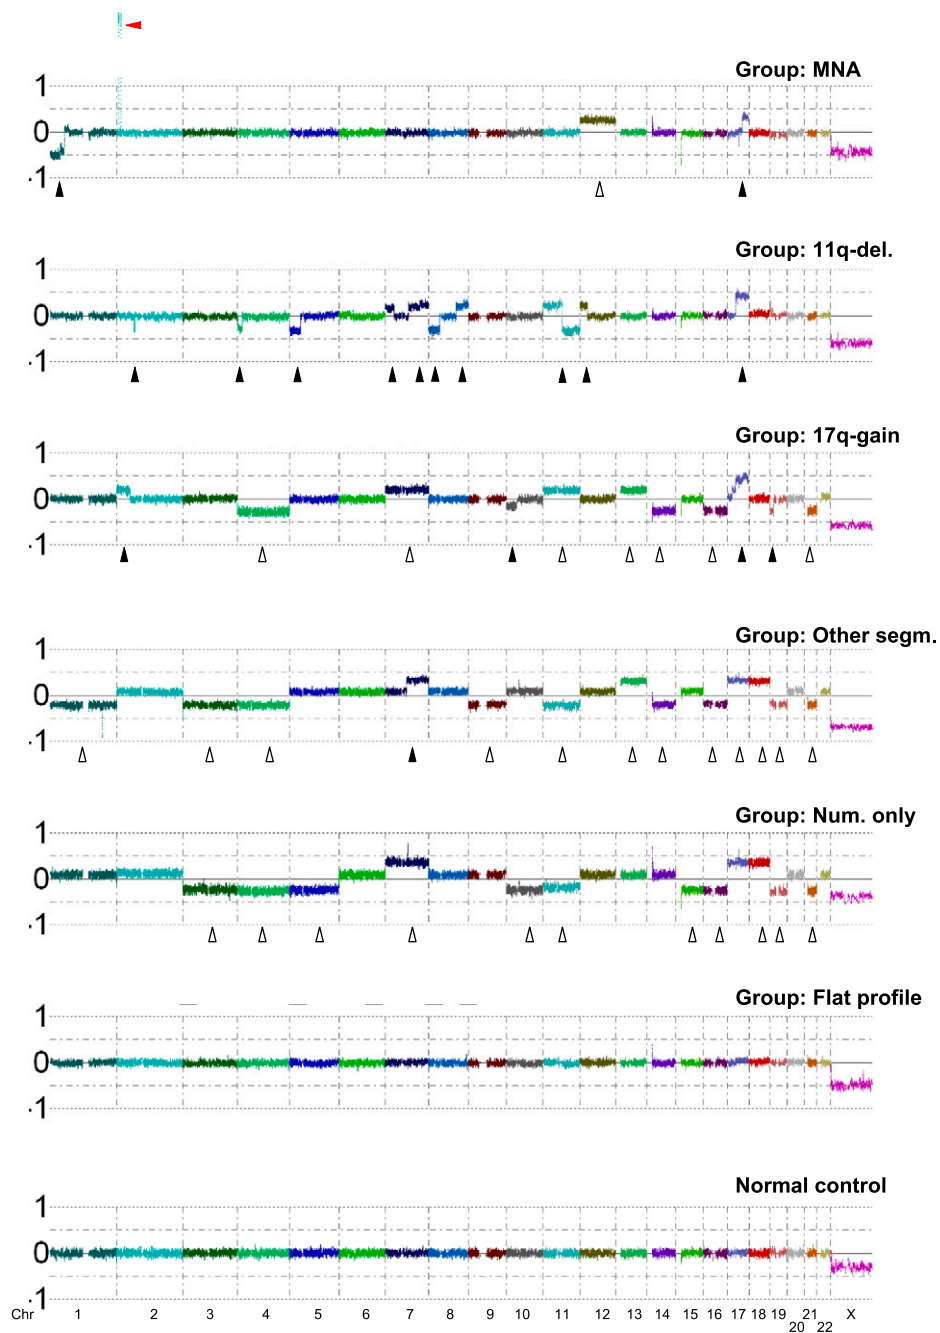

**Fig. S1.** Representative chromatograms of the SNP whole genomic profile groups studied. From top to bottom, the *MYCN*-amplification group (red arrow indicate the highly amplified “off-chart” signal), the 11q-deletion group, the 17q-gain group, the other segmental aberrations group, the numerical-only group, the flat profile group, and normal controls. All of these cases involve tumors from male patients compared with normal female controls, which explains the low X signal. Chromosomes with segmental aberrations are denoted by a solid arrowhead, whereas chromosomes with numerical deviations are denoted by open arrowheads. See *Materials and Methods* for definitions of the genomics profile groups.

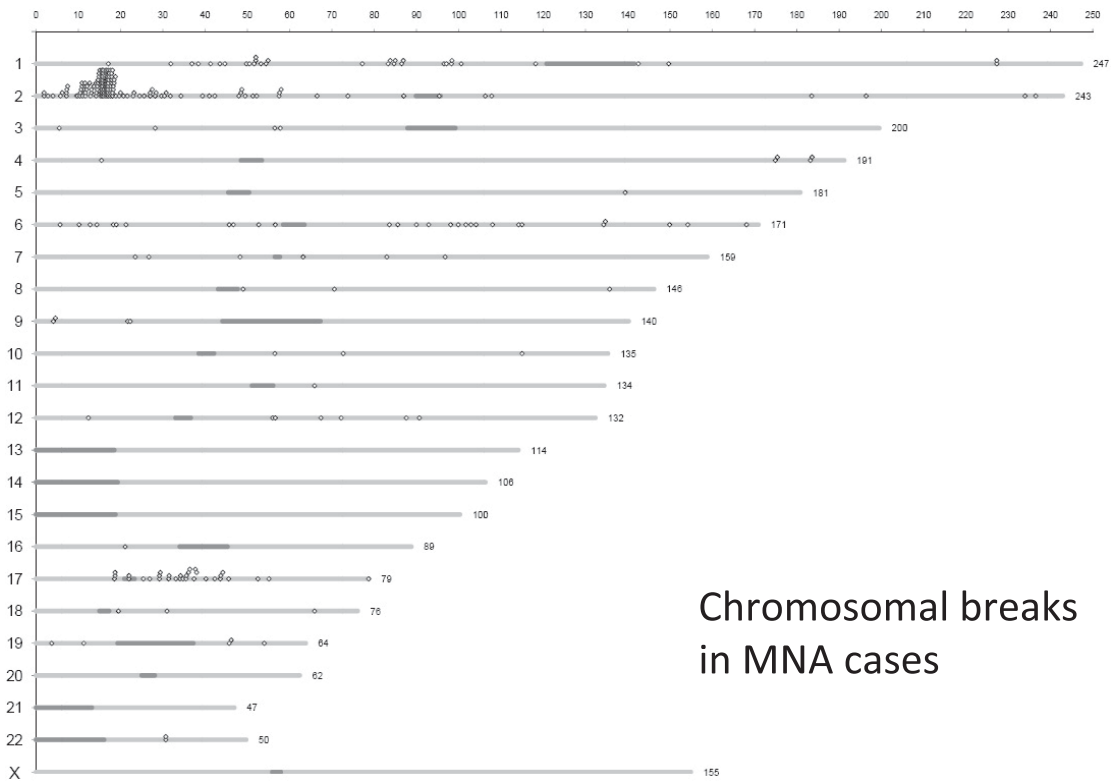

Chromosomal breaks  
in MYCN cases

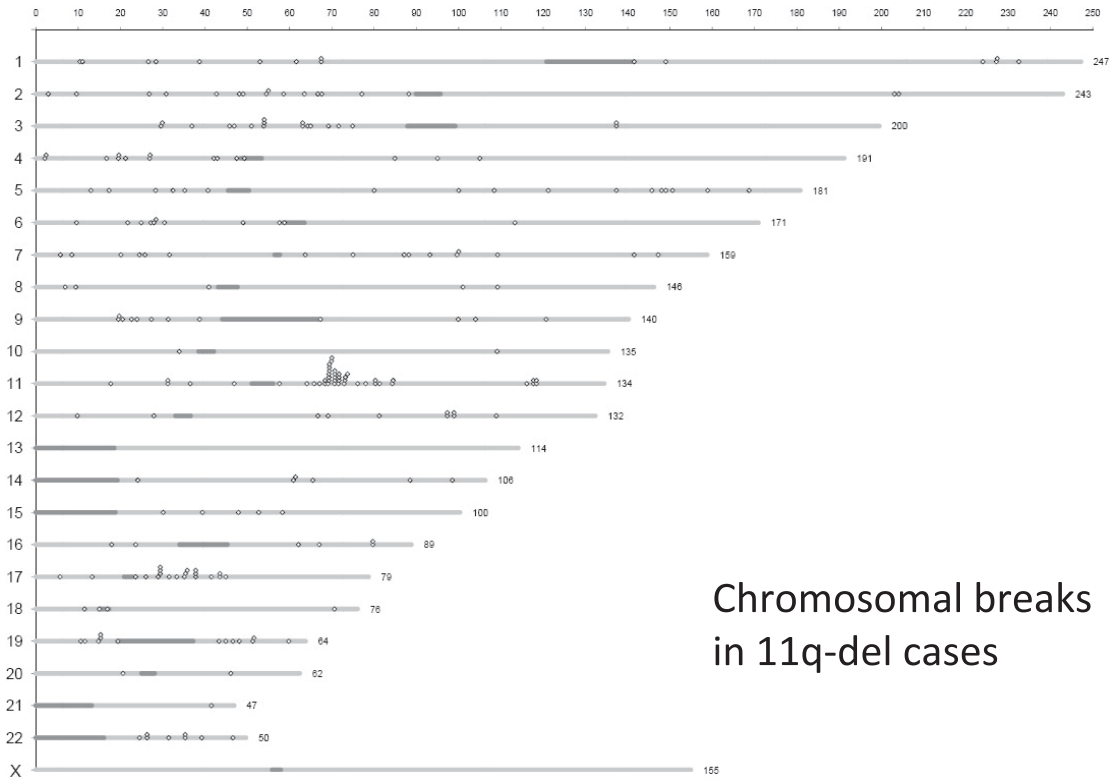

Chromosomal breaks  
in 11q-del cases

**Fig. S2.** Distribution of chromosomal breaks in *MYCN*-amplified tumors (*Top*) and 11q-deleted tumors (*Bottom*). Horizontal lines indicate the different chromosomes. The dark-gray sections on each line indicate centromeres and heterochromatic regions with low numbers of SNPs on the array. Numbers to the right indicate the length of the chromosomes (in Mb).

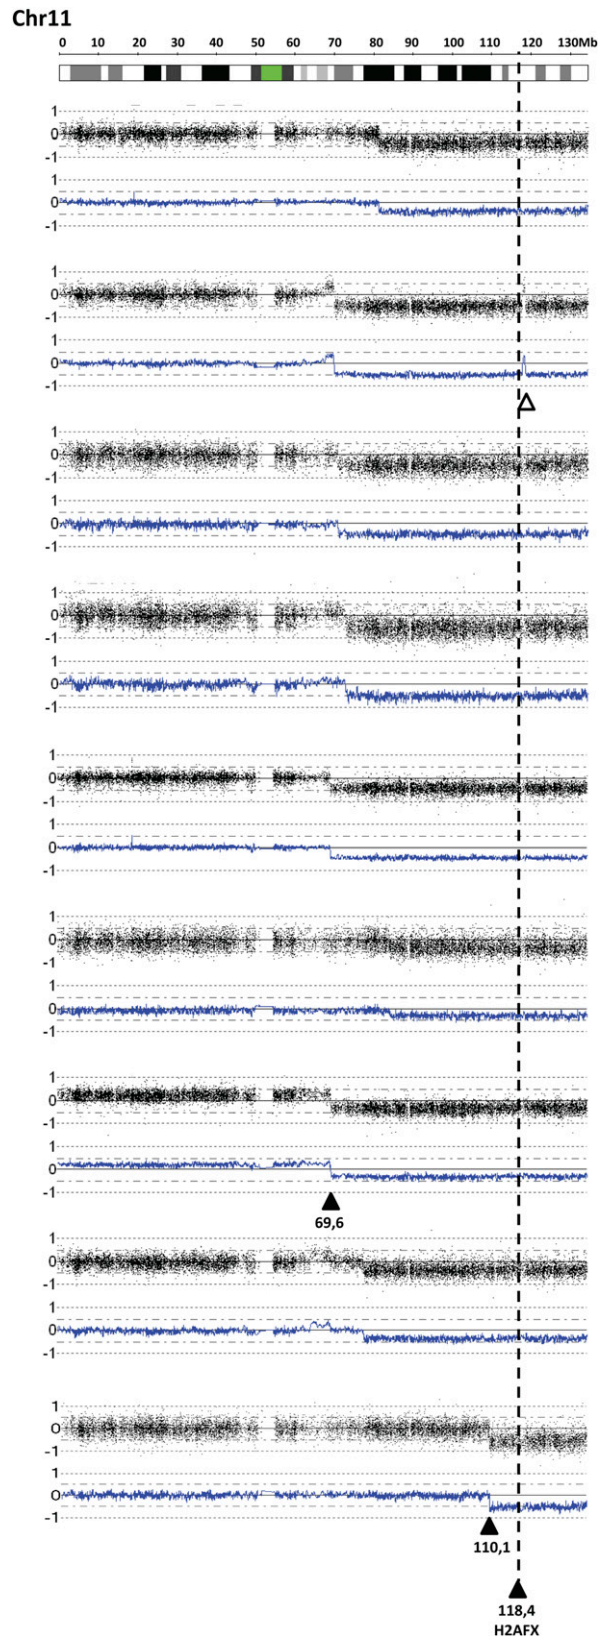

Fig. S3. Representative SNP array profiles for chromosome 11 in a number of 11q-deletion cases and the positions of the breakpoints relative to the *H2AFX*. One case showed a small rearrangement in the *H2AFX* region only (open arrow).

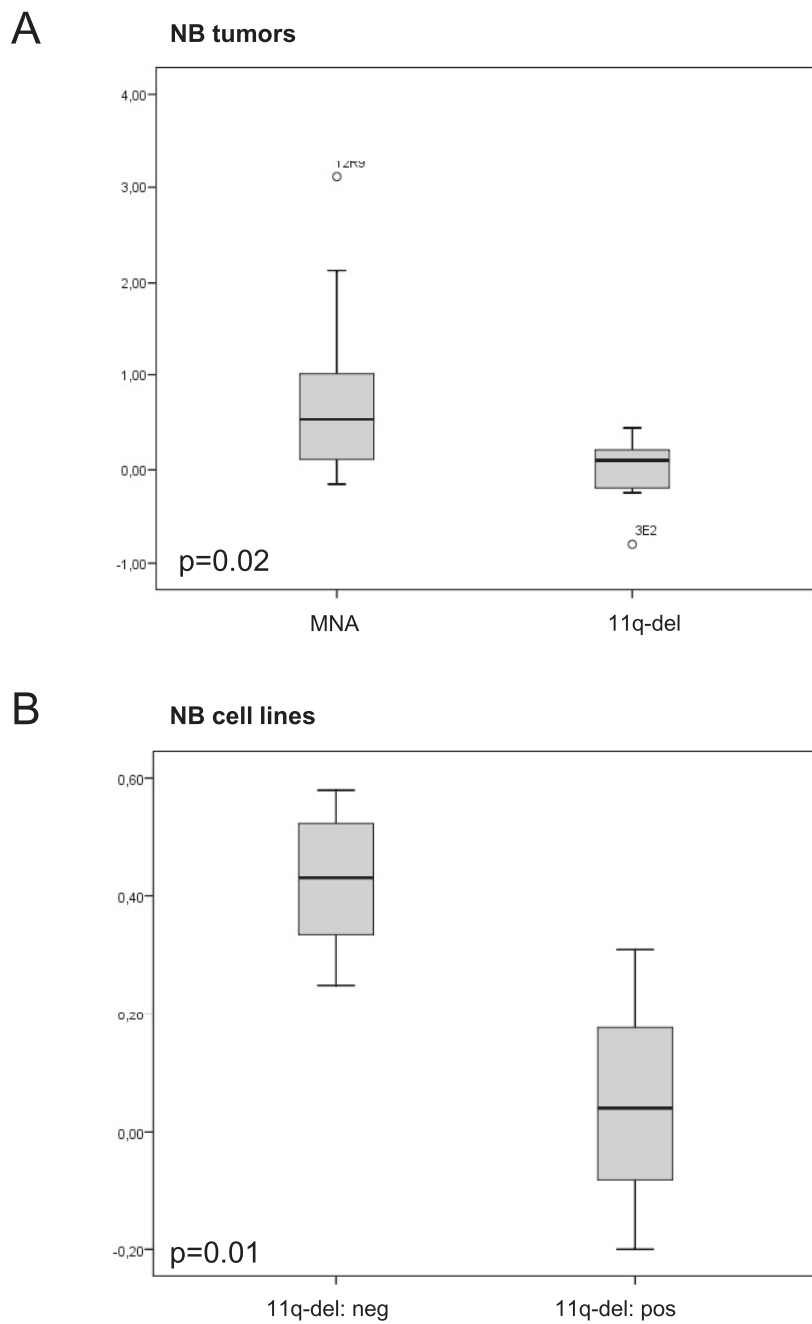

**Fig. S4.** Boxplots showing that (A) 11q-deleted NB tumors have significantly lower *H2AFX* expression compared with *MYCN*-amplified tumors with intact chromosomes 11 and (B) 11q-deleted NB cell lines have lower *H2AFX* expression compared with cell lines with intact 11 chromosomes. The ordinate represents *H2AFX* expression on a log-10 scale, and the level of significance is indicated in the lower left corner of the boxplots.

**Table S1. Data on stage, outcome and genomic profile group (same order as in Fig. 1)**

| Tumor ID | INSS stage* | INRG stage <sup>†</sup> | Outcome <sup>‡</sup> | Genomic profile group             |
|----------|-------------|-------------------------|----------------------|-----------------------------------|
| 1        | 4           | M                       | NED                  | MNA                               |
| 2        | 4           | M                       | DOD                  | MNA                               |
| 3        | 4           | M                       | NED                  | MNA                               |
| 4        | 4           | M                       | NED                  | MNA                               |
| 5        | 3           | L                       | NED                  | MNA                               |
| 6        | 1           | L                       | DOD                  | MNA                               |
| 7        | 4           | M                       | DOD                  | MNA                               |
| 8        | 4S          | MS                      | DOD                  | MNA                               |
| 9        | 4           | M                       | DOD                  | MNA                               |
| 10       | 4           | M                       | DOD                  | MNA                               |
| 11       | 4           | M                       | DOD                  | MNA                               |
| 12       | 4           | M                       | DOD                  | MNA                               |
| 13       | 3           | L                       | DOD                  | MNA                               |
| 14       | 4           | M                       | NED                  | MNA                               |
| 15       | 4           | M                       | DOD                  | MNA                               |
| 16       | 4           | M                       | DOD                  | MNA                               |
| 17       | 4           | M                       | DOD                  | MNA                               |
| 18       | 4           | M                       | DOD                  | MNA                               |
| 19       | 3           | L                       | DOD                  | MNA                               |
| 20       | 4S          | MS                      | DOD                  | MNA                               |
| 21       | 3           | L                       | NED                  | MNA                               |
| 22       | 4           | M                       | DOD                  | MNA                               |
| 23       | 4           | M                       | NED                  | MNA                               |
| 24       | 4           | M                       | DOD                  | MNA                               |
| 25       | 3           | L                       | NED                  | MNA                               |
| 26       | 4           | M                       | NED                  | MNA                               |
| 27       | 4           | M                       | DOD                  | MNA                               |
| 28       | 4           | M                       | NED                  | MNA                               |
| 29       | 4           | M                       | NED                  | MNA                               |
| 30       | 3           | L                       | NED                  | MNA                               |
| 31       | 3           | L                       | NED                  | MNA                               |
| 32       | 4           | M                       | NED                  | MNA                               |
| 33       | 4           | M                       | NED                  | MNA                               |
| 34       | 4           | M                       | DOD                  | MNA                               |
| 35       | 4           | M                       | NED                  | MNA                               |
| 36       | 4           | M                       | NED                  | MNA                               |
| 37       | 4           | M                       | DOD                  | MNA                               |
| 38       | 3           | L                       | DOD                  | MNA + 11q-del                     |
| 39       | 4           | M                       | DOD                  | 11q-del                           |
| 40       | 4           | M                       | DOD                  | 11q-del                           |
| 41       | 4           | M                       | NED                  | 11q-del                           |
| 42       | 2           | L                       | DOD                  | 11q-del                           |
| 43       | 4           | M                       | DOD                  | 11q-del                           |
| 44       | 4           | M                       | DOD                  | 11q-del                           |
| 45       | 3           | L                       | DOD                  | 11q-del                           |
| 46       | 4           | M                       | DOD                  | 11q-del                           |
| 47       | 3           | L                       | DOD                  | 11q-del                           |
| 48       | 4           | M                       | DOD                  | 11q-del                           |
| 49       | 4           | M                       | NED                  | 11q-del                           |
| 50       | 4           | M                       | DOD                  | 11q-del                           |
| 51       | 4           | M                       | NED                  | 11q-del                           |
| 52       | 4           | M                       | NED                  | 11q-del                           |
| 53       | 4           | M                       | DOD                  | 11q-del                           |
| 54       | 4           | M                       | DOD                  | 11q-del                           |
| 55       | 4           | M                       | NED                  | 11q-del                           |
| 56       | 3           | M                       | DOD                  | 11q-del                           |
| 57       | 3           | L                       | NED                  | 11q-del                           |
| 58       | 4           | M                       | NED                  | 11q-del                           |
| 59       | 1           | L                       | NED                  | 11q-del                           |
| 60       | 3           | L                       | NED                  | 17q-gain (without MNA or 11q-del) |
| 61       | 2           | L                       | NED                  | 17q-gain (without MNA or 11q-del) |
| 62       | 1           | L                       | NED                  | 17q-gain (without MNA or 11q-del) |
| 63       | 4           | M                       | NED                  | 17q-gain (without MNA or 11q-del) |

Table S1. Cont.

| Tumor ID | INSS stage* | INRG stage <sup>†</sup> | Outcome <sup>‡</sup> | Genomic profile group             |
|----------|-------------|-------------------------|----------------------|-----------------------------------|
| 64       | 4           | M                       | NED                  | 17q-gain (without MNA or 11q-del) |
| 65       | 2           | L                       | NED                  | 17q-gain (without MNA or 11q-del) |
| 66       | 3           | L                       | AWD                  | 17q-gain (without MNA or 11q-del) |
| 67       | 4           | M                       | DOD                  | 17q-gain (without MNA or 11q-del) |
| 68       | 4           | M                       | NED                  | 17q-gain (without MNA or 11q-del) |
| 69       | 4           | M                       | DOD                  | 17q-gain (without MNA or 11q-del) |
| 70       | 4           | M                       | NED                  | 17q-gain (without MNA or 11q-del) |
| 71       | 2           | L                       | DOD                  | 17q-gain (without MNA or 11q-del) |
| 72       | 4           | M                       | DOD                  | 17q-gain (without MNA or 11q-del) |
| 73       | 2           | L                       | NED                  | 17q-gain (without MNA or 11q-del) |
| 74       | 4           | M                       | NED                  | Other segmental                   |
| 75       | 4           | M                       | NED                  | Other segmental                   |
| 76       | 3           | L                       | NED                  | Other segmental                   |
| 77       | 1           | L                       | NED                  | Other segmental                   |
| 78       | 1           | L                       | NED                  | Other segmental                   |
| 79       | 2           | L                       | NED                  | Other segmental                   |
| 80       | 1           | L                       | NED                  | Other segmental                   |
| 81       | 3           | L                       | NED                  | Other segmental                   |
| 82       | 2           | L                       | NED                  | Other segmental                   |
| 83       | 2           | L                       | NED                  | Other segmental                   |
| 84       | 3           | L                       | NED                  | Other segmental                   |
| 85       | 2           | L                       | NED                  | Other segmental                   |
| 86       | 2           | L                       | NED                  | Other segmental                   |
| 87       | 2           | L                       | NED                  | Other segmental                   |
| 88       | 1           | L                       | NED                  | Num only                          |
| 89       | 4S          | MS                      | NED                  | Num only                          |
| 90       | 1           | L                       | NED                  | Num only                          |
| 91       | 3           | L                       | NED                  | Num only                          |
| 92       | 1           | L                       | NED                  | Num only                          |
| 93       | 2           | L                       | NED                  | Num only                          |
| 94       | 2           | L                       | NED                  | Num only                          |
| 95       | 3           | L                       | NED                  | Num only                          |
| 96       | 1           | L                       | NED                  | Num only                          |
| 97       | 3           | L                       | NED                  | Num only                          |
| 98       | 2           | L                       | NED                  | Num only                          |
| 99       | 1           | L                       | NED                  | Num only                          |
| 100      | 3           | L                       | NED                  | Num only                          |
| 101      | 1           | L                       | NED                  | Num only                          |
| 102      | 1           | L                       | NED                  | Num only                          |
| 103      | 2           | L                       | NED                  | Num only                          |
| 104      | 1           | L                       | NED                  | Num only                          |
| 105      | 4S          | MS                      | NED                  | Num only                          |
| 106      | 2           | L                       | DOD                  | Num only                          |
| 107      | 4S          | MS                      | NED                  | Num only                          |
| 108      | 4S          | MS                      | NED                  | Num only                          |
| 109      | 3           | L                       | DSC                  | Num only                          |
| 110      | 2           | L                       | NED                  | Num only                          |
| 111      | 2           | L                       | NED                  | Num only                          |
| 112      | 1           | L                       | NED                  | Num only                          |
| 113      | 4S          | MS                      | NED                  | Num only                          |
| 114      | 1           | L                       | NED                  | Num only                          |
| 115      | 2           | L                       | NED                  | Num only                          |
| 116      | 1           | L                       | NED                  | Num only                          |
| 117      | 1           | L                       | NED                  | Num only                          |
| 118      | 4           | M                       | DOD                  | Num only                          |
| 119      | 3           | L                       | NED                  | Num only                          |
| 120      | 1           | L                       | NED                  | Num only                          |
| 121      | 1           | L                       | NED                  | Num only                          |
| 122      | 1           | L                       | NED                  | Num only                          |
| 123      | 4           | M                       | DOD                  | Num only                          |
| 124      | 2           | L                       | NED                  | Num only                          |
| 125      | 2           | L                       | NED                  | Num only                          |

**Table S1. Cont.**

| Tumor ID | INSS stage* | INRG stage <sup>†</sup> | Outcome <sup>‡</sup> | Genomic profile group |
|----------|-------------|-------------------------|----------------------|-----------------------|
| 126      | 1           | L                       | NED                  | Num only              |
| 127      | 3           | L                       | NED                  | Num only              |
| 128      | 3           | L                       | NED                  | Num only              |
| 129      | 3           | L                       | NED                  | Num only              |
| 130      | 4S          | MS                      | NED                  | Num only              |
| 131      | 2           | L                       | NED                  | Num only              |
| 132      | 1           | L                       | NED                  | Num only              |
| 133      | 2           | L                       | NED                  | Num only              |
| 134      | 1           | L                       | NED                  | Num only              |

\*Neuroblastoma stage according to INSS (reference 24).

<sup>†</sup>Neuroblastoma stage according to INRG (reference 25). Due to lack of imaging data L1 and L2 stages are denoted L.

<sup>‡</sup>Outcome: NED = No evidence of disease, AWD = alive with disease, DOD = Dead of disease, DSC = dead of surgical complications.

1. Brodeur GM, et al. (1993) Revisions of the international criteria for neuroblastoma diagnosis, staging, and response to treatment. *J Clin Oncol* 11:1466–1477.
2. Monclair T, et al., INRG Task Force (2009) The International Neuroblastoma Risk Group (INRG) staging system: An INRG Task Force report. *J Clin Oncol* 27:298–303.
